# Supplementary material for: The Genome of Rhyzopertha dominica (Fab.) (Coleoptera: Bostrichidae): Adaptation for Success
Source: MDPI journal article supplement (doi:10.3390/genes13030446), 2022-02-28
Supplement: s1 [file s1]

**Supplementary Table S4.** Genomic organization of *R. dominica* Bt-R1-like cadherin gene. The number and length of the deduced exons and their encoding cadherin domains are shown. All the intron-exon borders provided were followed the GT-AG rule for RNA 5' acceptor and 3' donor splice sites. The exon sequences are shown in upper case, coding regions for the first and last exons are shown in parentheses, asterisk indicate that the lengths provided for 5'- and 3'-UTRs were only approximate. The start and stop codon (TGA) were underlined and shaded grey, respectively. The transposable elements (TE) predicted by Censor ([www.girinst.org/censor/](http://www.girinst.org/censor/)) inside the introns of cadherin gene are provided.

| Exon        |           | Protein domain | Intron/exon junction           | Exon/Intron junction           | Intron    |                        |
|-------------|-----------|----------------|--------------------------------|--------------------------------|-----------|------------------------|
| No          | Size (bp) |                | 5'-Acceptor                    | 3'-Donor                       | Size (bp) | TE classes             |
| -1 (5'-UTR) | 134*      |                |                                | ATTTTATAG <u>gt</u> atacaaat   | 803       | nd                     |
| 1           | 67 (64)   | SP             | tttttttc <u>ag</u> GATATGGACA  | TTCAAGGGT <u>g</u> taagtatgt   | 52        | nd                     |
| 2           | 135       | EC1            | aacatgac <u>ag</u> TACATAGCTG  | AATTATGAT <u>g</u> taagtttat   | 15 217    | LTR/Gypsy; DNA/Transib |
| 3           | 266       | EC1, EC2       | aatttttc <u>ag</u> GGTCGTCAAC  | CCAAATTGAG <u>g</u> taagtaaac  | 17 337    | LTR/Gypsy              |
| 4           | 90        | EC2            | tttcttgc <u>ag</u> GAAAACTACG  | TTCTGGAAC <u>g</u> taagtataa   | 623       | nd                     |
| 5           | 147       | EC2            | ttatttttc <u>ag</u> AGAAACGAAA | GACGGTAAC <u>g</u> taagttaat   | 23 227    | DNA/Mariner; LTR/Gypsy |
| 6           | 120       | EC2, EC3       | acttttttc <u>ag</u> GACAGCGGCA | AACCGAACAG <u>g</u> tttgtataa  | 51        | nd                     |
| 7           | 73        | EC3            | tgtgttttc <u>ag</u> CACTTTTCCG | GAGTCTGAAT <u>g</u> taatatata  | 55        | nd                     |
| 8           | 281       | EC3, EC4       | gcgatttc <u>ag</u> ATGACGATCT  | TAGAGACTCG <u>g</u> taagtattt  | 2 115     | nd                     |
| 9           | 371       | EC4, EC5       | ttcttttc <u>ag</u> ATAGAAAACG  | ACGAAATTAG <u>g</u> taagtattag | 3 821     | nd                     |
| 10          | 229       | EC5            | tatcttttc <u>ag</u> GTACAGTCTA | GATCAGAGTT <u>g</u> taagtaact  | 3 021     | nd                     |
| 11          | 173       | EC6            | atacttttc <u>ag</u> GAATCACTAA | ACTATAGAGA <u>g</u> taagtacat  | 15 511    | LTR/Bel, LTR/Gypsy     |
| 12          | 179       | EC6            | tatattgt <u>ag</u> CTGCATACTG  | ACTGCTGCAG <u>g</u> taacacaaat | 143       | nd                     |
| 13          | 172       | EC6, EC7       | catcttct <u>ag</u> TTACTGTTAC  | ATTCCATTGAG <u>g</u> taagtaact | 8 981     | LTR/Gypsy              |
| 14          | 160       | EC7            | taaattttc <u>ag</u> GCCAGCAGGC | CACTGCAGAA <u>g</u> taagaagtt  | 2 402     | Non-LTR/RTE            |
| 15          | 136       | EC7, EC8       | cgttatgc <u>ag</u> ATCCAGATTT  | GACCGTGATAG <u>g</u> taagtatat | 590       | nd                     |
| 16          | 192       | EC8            | cttttgtt <u>ag</u> GTCCTTACAA  | TACTCAACAG <u>g</u> taaaatagg  | 69        | nd                     |
| 17          | 113       | EC8, EC9       | tataccct <u>ag</u> GTGGCATACA  | TACATCTAAT <u>g</u> taagtaaata | 357       | nd                     |
| 18          | 219       | EC9            | atgttcac <u>ag</u> AATACTCAAA  | GATCATTCAG <u>g</u> tatttttagt | 87        | nd                     |
| 19          | 132       | EC9, EC10      | caatttttc <u>ag</u> GTGAACGATT | CCTTAGAAAG <u>g</u> taagaagaa  | 77        | nd                     |
| 20          | 112       | EC10           | gcttttttc <u>ag</u> ACCCAAAACG | ATCGACTCTG <u>g</u> ttagtaata  | 4 647     | LTR/Gypsy              |
| 21          | 110       | EC10           | atttttgt <u>ag</u> ATGATTCAGA  | TCAATATACC <u>g</u> taagttact  | 54        | nd                     |
| 22          | 399       | EC10, EC11     | atgggttgc <u>ag</u> TTGAATATAA | TACTATTAA <u>g</u> taaaacatt   | 1 129     | nd                     |
| 23          | 102       | EC11, EC12     | tacattttc <u>ag</u> GTAATTGATG | TACAGTTTCAG <u>g</u> taagttttt | 54        | nd                     |
| 24          | 196       | EC12           | ttgcttta <u>ag</u> GCGTACGATC  | ACTGACCCAC <u>g</u> taagtaacg  | 5 106     | DNA/Mariner, LTR/Gypsy |
| 25          | 113       | EC12, MPED     | tcccttac <u>ag</u> CTCCATATCA  | TCAGTCCGAG <u>g</u> ttcactttt  | 53        | nd                     |
| 26          | 164       | MPED           | tttgttttc <u>ag</u> GTAAAAGATG | CAATACAGAG <u>g</u> tactaatgc  | 65        | nd                     |

|    |              |          |                                |                                |     |    |
|----|--------------|----------|--------------------------------|--------------------------------|-----|----|
| 27 | 201          | MPED, TM | atcatttt <b>ag</b> CAAACCTTAGT | AGCTACAAAC <b>gt</b> aagttaac  | 295 | nd |
| 28 | 165          | CYT      | aatggttac <b>ag</b> ATTGAAACGA | ATCGATCAAG <b>gt</b> acgttttt  | 61  | nd |
| 29 | 270*<br>(82) | CYT      | gtgtatac <b>ag</b> TATTCATAGT  | AAGATACT <b>TGA</b> CAAAGTGAAT | -   |    |
