# Supplementary material for: The Genome of Rhyzopertha dominica (Fab.) (Coleoptera: Bostrichidae): Adaptation for Success
Source: MDPI journal article supplement (doi:10.3390/genes13030446), 2022-02-28
Supplement: s1 [file s1]

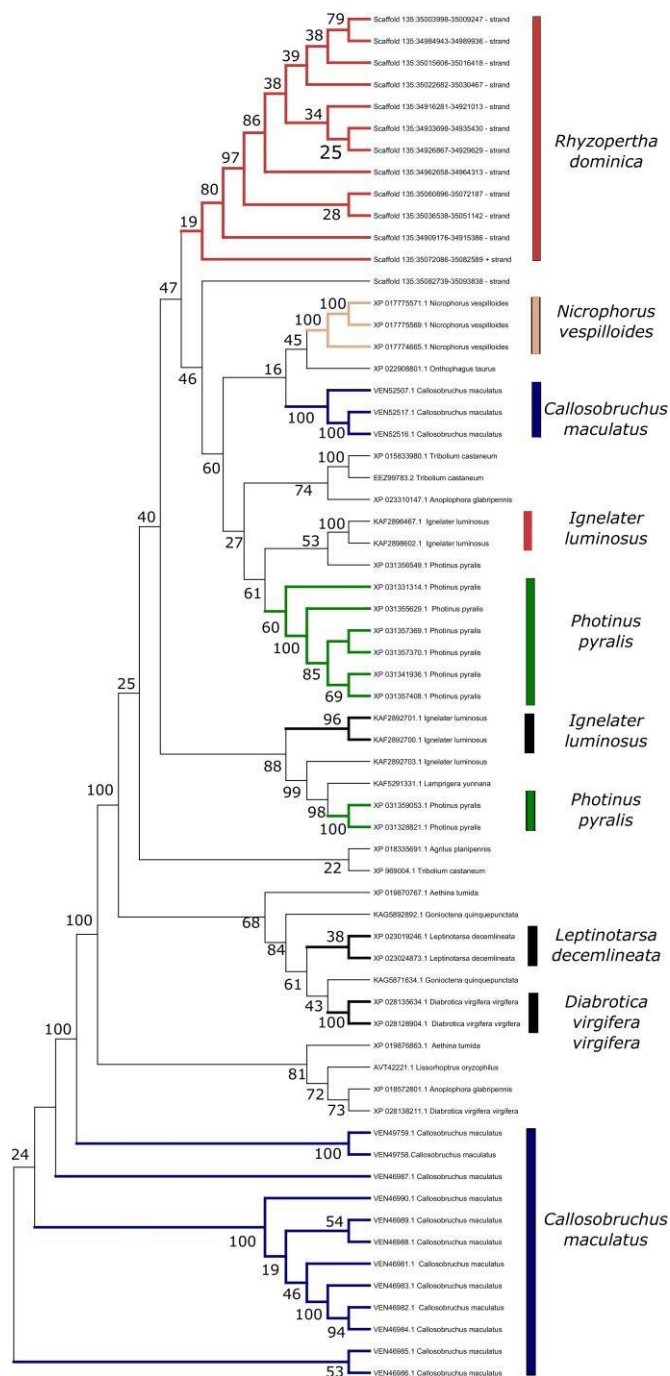

**Supplementary Figure S3.** Phylogenetic comparison of UGT sequences found on scaffold 135 of the *R. dominica* genome and grouping within a single clade and those found in other clades (*Nicrophorus vespilloides*, *Callosobruchus maculatus*, *Ignelater luminosus*, *Photinus pyralis*, *L. decemlineata* and *D. virgifera virgifera*).
