# Supplementary material for: The Genome of Rhyzopertha dominica (Fab.) (Coleoptera: Bostrichidae): Adaptation for Success
Source: MDPI journal article supplement (doi:10.3390/genes13030446), 2022-02-28
Supplement: s1 [file s1]

**Supplementary Table S5.** Composition of repetitive elements in the *R. dominica* genome obtained by RepeatModeler,

| Classification | Total  | With Domains | % With Domains |
|----------------|--------|--------------|----------------|
| DNA            | 7521   | 134          | 1.78           |
| DNA/Academ     | 163    | 1            | 0.61           |
| DNA/CMC        | 5145   | 5            | 0.1            |
| DNA/Crypton    | 706    | 50           | 7.08           |
| DNA/Ginger     | 220    | 26           | 11.82          |
| DNA/hAT        | 5167   | 330          | 6.39           |
| DNA/IS3EU      | 10     | 0            | 0              |
| DNA/Kolobok    | 39     | 26           | 66.67          |
| DNA/Maverick   | 1458   | 145          | 9.95           |
| DNA/Merlin     | 202    | 26           | 12.87          |
| DNA/MULE       | 2686   | 245          | 9.12           |
| DNA/P          | 1332   | 165          | 12.39          |
| DNA/PIF        | 700    | 220          | 31.43          |
| DNA/PiggyBac   | 441    | 88           | 19.95          |
| DNA/Sola       | 6      | 0            | 0              |
| DNA/Sola1      | 271    | 53           | 19.56          |
| DNA/TcMar      | 117278 | 6719         | 5.73           |
| LINE           | 9840   | 351          | 3.57           |
| LINE/CR1       | 23833  | 1518         | 6.37           |
| LINE/Dong      | 141    | 39           | 27.66          |
| LINE/I         | 3455   | 206          | 5.96           |
| LINE/Jockey    | 5011   | 484          | 9.66           |
| LINE/L1        | 146    | 57           | 39.04          |
| LINE/L2        | 33966  | 2609         | 7.68           |
| LINE/LOA       | 876    | 109          | 12.44          |
| LINE/Penelope  | 46770  | 1970         | 4.21           |
| LINE/R1        | 789    | 122          | 15.46          |
| LINE/R2        | 5      | 2            | 40             |
| LINE/RTE       | 5210   | 439          | 8.43           |
| LTR            | 400    | 288          | 72             |
| LTR/Copia      | 3096   | 224          | 7.24           |
| LTR/DIRS       | 713    | 87           | 12.2           |
| LTR/Gypsy      | 17612  | 2200         | 12.49          |
| LTR/Pao        | 4761   | 705          | 14.81          |
| RC/Helitron    | 443    | 52           | 11.74          |
| Retroelement   | 1772   | 1772         | 100            |
| rRNA           | 29     | 0            | 0              |
| Satellite      | 2      | 0            | 0              |
| Simple_repeat  | 68     | 0            | 0              |
| SINE/tRNA      | 30     | 0            | 0              |
| TE             | 15834  | 132          | 0.83           |
| tRNA           | 1      | 0            | 0              |
