# Supplementary material for: The Genome of Rhyzopertha dominica (Fab.) (Coleoptera: Bostrichidae): Adaptation for Success
Source: MDPI journal article supplement (doi:10.3390/genes13030446), 2022-02-28
Supplement: s1 [file s1]

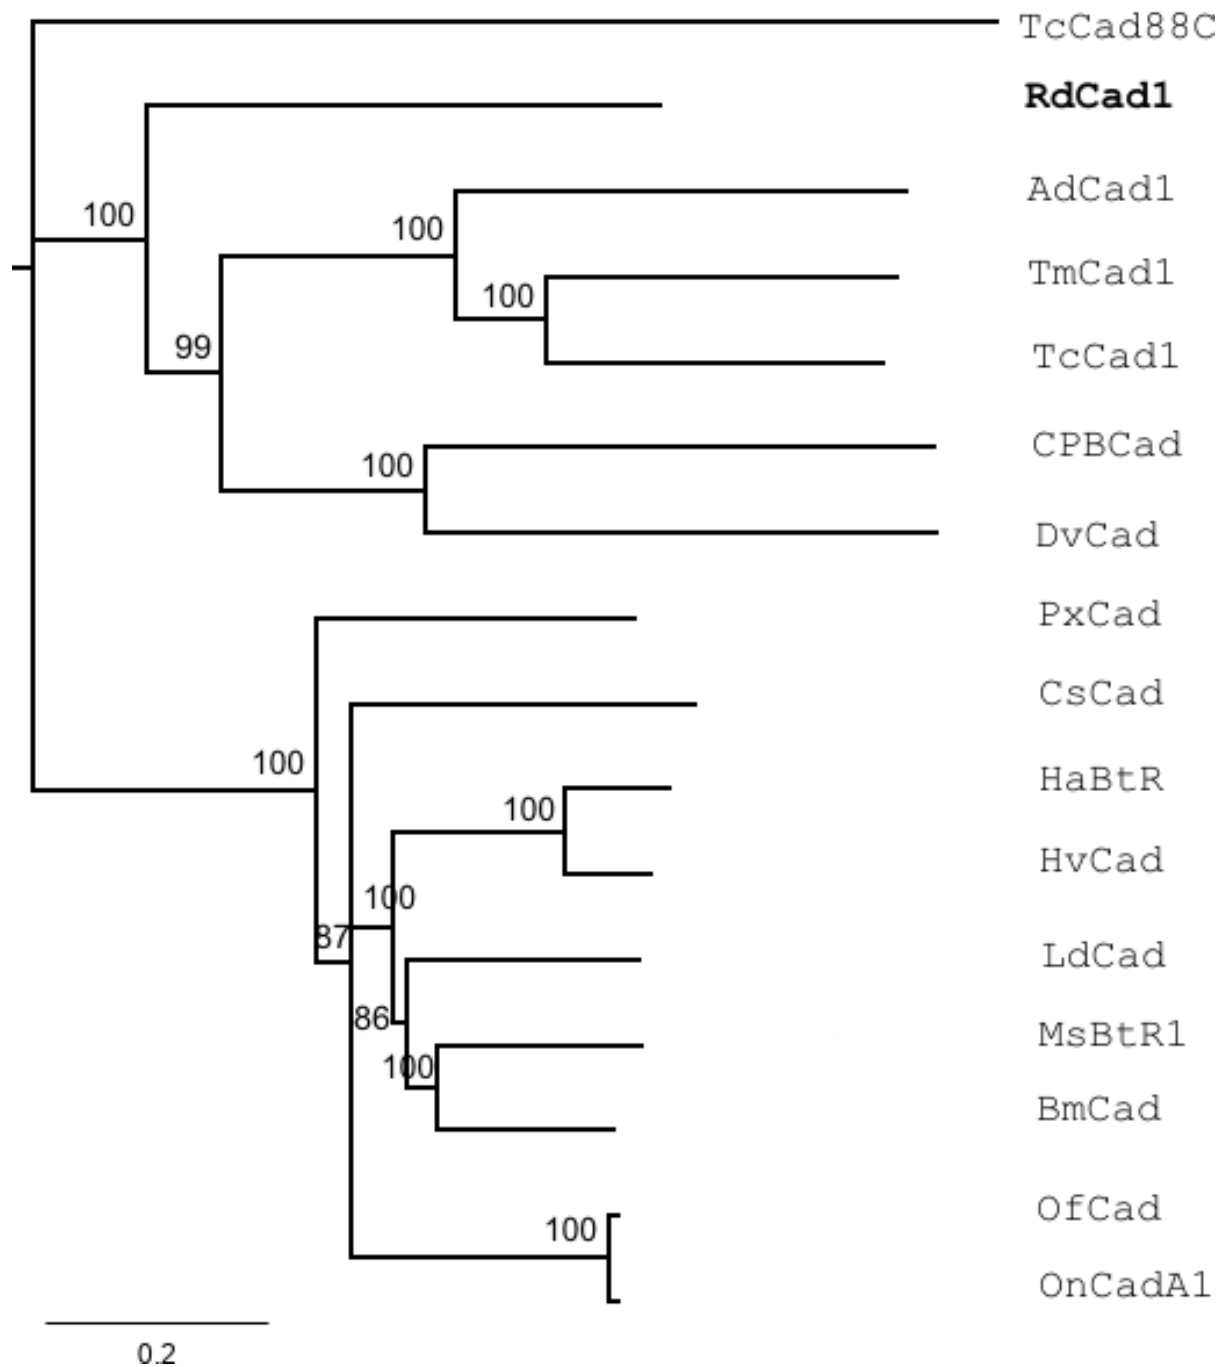

**Supplementary Figure S7.** Phylogenetic analysis of insect cadherin protein sequences.

Phylogenetic data obtained from ClustalW-aligned sequences were processed using Maximum Likelihood tree builder algorithm (MEGA X) with 500 bootstrap iterations. Protein sequences used in the analysis were from *M. sexta* (MsBtR1), *Bombyx mori* (BmCad, BAA99404), *H. virescens* (HvCad), *H. armigera* (HaBtR), *L. dispar* (LdCad), *Ostrinia furnacalis* (OfCad), *O. nubilalis* (OnCadA1, AAT37678), *Plutella xylostella* (PxCad, ABU41413), *Chilo suppressalis* (CsCad, AAM78590), *R. dominica* (RdCad1), *A. diaperinus* (AdCad1); *T. molitor* (TmCad1), *T. castaneum* (TcCad1), *Leptinotarsa decemlineata* (CPBCad), *D. virgifera* (DvCad). The *T. castaneum* cadherin (TcCad88C, XP\_971786), was used as an outgroup. The tree was drawn to scale, with branch lengths showing the number of substitutions per site.
