# Supplementary material for: The Genome of Rhyzopertha dominica (Fab.) (Coleoptera: Bostrichidae): Adaptation for Success
Source: MDPI journal article supplement (doi:10.3390/genes13030446), 2022-02-28
Supplement: s1 [file s1]

**Supplementary Table S6.** Consensus monomer sequences of the 10 most prominent repeat families in the *R. dominica* genome.

| Repeat   | Monomer Consensus Sequence                                                                                                                                                                                                                                                                                               |
|----------|--------------------------------------------------------------------------------------------------------------------------------------------------------------------------------------------------------------------------------------------------------------------------------------------------------------------------|
| RD rep1  | GCTCCAGCTTGCCCAGAGCTAGCTCCAGCTAGCTCCACTAAAGAGAAAGCTAGCTCCACCTTACTTG<br>AGTAGTTATAAGCTCATCATTTTCGGGGGGTGCTAACTTAACGTTATCCTCGCCATGGCCTCAAATCTG<br>TTTCAAAACCTA                                                                                                                                                             |
| RD rep2  | ATTAGAGACGATGCATTCACTTTAATACGGCATCCTCTTATGCATTCTGGAAACAGTTGCTTCATTAT<br>AGCAGATCGGAAGCGAAGACGACCATTAAAAGGCACAATTGGTCAAACCTAACAAT                                                                                                                                                                                         |
| RD rep3  | TAATAACGTATTTGGTTAAACTAATACCATAAGAGTTTATTCTTTCCACTTAATACGGCATACTATAT<br>ACGCTTGCTGGACCCAGCTTCGTCATTACAGCTTATCGTATATAAGGCGACCGTCTAA                                                                                                                                                                                       |
| RD rep4  | CAAGCATAACAGATTGTGTCGCTTTAAATCAAACAATATAGTCCCTTATACTATTATATTGAGCAAA<br>AGCGTTATTAGAAGCTAGACGTATCTTCCTGACTCATATAATACCAGCATTGTACCCAG                                                                                                                                                                                       |
| RD rep5  | GACCGATTTGAATGAATTTTTTTGTATGCGTTTGGGTGGCGCCCTGGATGGTTTAGATTACAAATCA<br>GCCCCGGCAGATGGCGCTGCAGTCGGTATCTAGGTTATTTATCTATACTGCAACTAAACG                                                                                                                                                                                      |
| RD rep6  | CATTCCGAAATTCAGGAGGTCCAGATTAGTAAATATGCTTGAAATTATACAAATCGGAGGTGCAAA<br>AATTTTAAGGTCCAAAAAGAACAAGGGGTTAGCCTTTGATGTTTTGTGATTTTTTCGGTGGAACTA<br>ATTTTAGCTCAAAATCGACAAACAGATGTATTTTGAGCTGCAGATTCCAAAAATTTGATCAGAAATG<br>AGCTAGGACGTCGGGCGGCCTAATTTACTCCGCTTTTAGATCGAACCGTTGTAGCTAGCGACAAACG<br>GATAC                          |
| RD rep7  | TTAGCCTTTGCTTTTTTGCAGTTTTTCGGTGGAATTATTTTTGGCTCAAAATCGGCATACTGATGTATT<br>TTGAGCTGCAGATTCCAAAAATGCAGTCAGAAATGAGCTAGGACGTCCGGAAATTTATTTTTTCGCAA<br>ATTGACCCCTTCTACTCTAGGTCACCTTTTCAGACGAACCGTTGCAGCTAGAGACCAACTGACACCACT<br>CCGAAATGCAGCAGGTCCACATTAGTAAATGAACATAAAATTAGCGTAATCGGAGACCATCAAGTT<br>TCAAGGTGAAAAAACAACAAGGGG |
| RD rep8  | GGTCAAACAATCGGTTACAGATTTCGGTGAGATGAATTCAAAAAGTTTAAGCACGTTTTATCGCAGC<br>GCAGTGGTTTGACAAATTATAGTTTGTCTGAATTATAATTGGT                                                                                                                                                                                                       |
| RD rep9  | AAAAGATGGGCAATTGTGCTTCAATTTGGTGGCTAACTTCCAAATATAAAAAATATTGATTTTACTAA<br>AAAGGGGTCATGTGGCTAAGTTAACACATGAAGCACAATGAAGCACAATCGAAGCACTAAAGACTA<br>GT                                                                                                                                                                         |
| RD rep10 | TCTAATTACGGCAATGAATTGTGCTCGTTTTGTGCTGAAATGTGCCGGTGTGAGGGAGTTTTGTGCAG<br>CAACCCTTATATTTAATTTTTTAAAAACACCGGCGGGCGGGGCCAGCTTGACGGTCAGCCCCGCTTT<br>TTTTGGGAATATTCAAAA                                                                                                                                                        |
