# Supplementary material for: The Genome of Rhyzopertha dominica (Fab.) (Coleoptera: Bostrichidae): Adaptation for Success
Source: MDPI journal article supplement (doi:10.3390/genes13030446), 2022-02-28
Supplement: s1 [file s1]

GAGCTGTACCATCGCCATTTTTATATCGTCTTTGTTTTAACTAGCCAACTTTTTAATAATGTAAC 68  
 ATTTCTTCAGTTCTCAATATCTCGATCGAGTATGTAGATACAGAAAACTGTAGACATTTTTATAGGA 136  
 TATGGACAAAGCAATTCGCTTTTATTATATGTTTAAATAATAGCTCTTTTACCTTCAAGGGTGTAC 204  
 M D K A I R F Y L Y G L I I A L F T F K G V 22  
 -----  
 ATAGCTGGAGCTTCATACATTCCGATGACGACAGAGTTGACACAACCTGACGTCATCACTACAAATAAT 272  
 H S W S F I H S D D D R V D T T D V I T T N N 45  
 -----  
 ATCCTAGTATATATGGATGAAGAACTGGAACCTAATATTATACTAGCATACGTGAATTATGATGGGTC 340  
 I L V Y M D E E L E P N I I L A Y V N Y D G S 68  
 -----  
 GTC AACACCAGAAATAGCACAGATTAATCCAGACAACAGTATTATAGGAGCAGTATTACAAGAAGAAT 408  
 S T P E I A Q I N P D N S I I G A V L Q E E 90  
 -----  
 CACTTGAAGGCGAATCTTATTGGGCAGTTGTAATAACTAACAAAATTGATTATGAATCCATCCCAGAA 476  
 S L E G E S Y W A V V I T N K I D Y E S I P E 113  
 -----  
 GATGTGATGGTGTTCGAAATAGAAATATCAGTTGAAGGTGACAGCAATACAATATTTCTTTACGTACA 544  
 D V M V F E I E I S V E G D S N T I F L Y V Q 136  
 -----  
 GAACATAGATGATAATGCACCAATAATAGTTGTTGTACAAACCCATGCCAAATTGAGGAAAACCTACG 612  
 N I D D N A P I I V V V T N P C Q I E E N Y 158  
 -----  
 CTGGTCCTTCCAACCTGTACATACAACATACAAGATGCTGATGGATGGCTACAATATATGAAAATGGAT 680  
 A G P S N C T Y N I Q D A D G W L Q Y M K M D 181  
 -----  
 GTTTCTGGAACAAGAAACGAAACGGAACCTCTCAAATTTGAATACGAAGATCTAAATGAGATAACTAA 748  
 V S G T R N E T E L F K F E Y E D L N E I T N 204  
 -----  
 TACAACAAAATCAGCATCATTGCTGCTACATACTATAGCAGAACTGGACTATGAAACAATAACTCTCC 816  
 T T K S A S L L L H T I A E L D Y E T I T L 226  
 -----  
 ATCTGATTAACTGGACGGTAACGGACAGCGCAATCATTCTGTATCACAAACGGTGGTTGTAAATGTT 884  
 H L I N W T V T D S G N H S V S Q T V V V N V 249  
 -----  
 ATTGACCTACCTGATACTCCACCTAGATGGACGACAATTTTTGCAACTCAACAGTTTGACGAAAAAAC 952  
 I D L P D T P P R W T T I F A T Q Q F D E K T 272  
 -----  
 CGAACAGCACTTTTCCGTTGCAGCTATAGACGGAGACATTGGAGTAAATGACGATATAAAATATTCCT 1020  
 E Q H F S V A A I D G D I G V N D D I K Y S 294  
 -----  
 TAGAGTCTGAATATGACGATCTGTTTTCTATCGACAGCACTACAGGTGACCTCTATGTTAATGAAATT 1088  
 L E S E Y D D L F S I D S T T G D L Y V N E I 317  
 -----  
 GACCGTGATACATTGAACATGCAAATTTTACATTCTTATATTTGCAACAGAGGAAAATGACCCATG 1156  
 D R D T L N M Q I F T F L I F A T E E N D P W 340  
 -----  
 GTATTCTACTAATCAAACCATCACATTTGTTGTAAATGATGTAAATGATCATGCTCCTAATGTAACAG 1224  
 Y S T N Q T I T F V V N D V N D H A P N V T 362  
 -----  
 ATCCTGATCCAAAACAAATACACTTTTTACTGTTAGAAGAAAGGGTAACGCAACTGAATGATACGATT 1292  
 D P D P K Q I H F L L L E E R V T Q L N D T I 385  
 -----  
 TCTGTACTAGATAGAGACTCGATAGAAAACGCCATGTTTACTATATCTTTGCAAGATACATCCGATAA 1360  
 S V L D R D S I E N A M F T I S L Q D T S D N 408

TGGCATT TTTGTACACCGAGGCTTTTCAAGTTCCTTCGCAAGGGTATCAGAATTACACGTTTTCTTTAT 1428  
 G I L Y T E A F Q V P S Q G Y Q N Y T F S L 430  
 \*  
 CAATCATCGACAGTAGCCTCTTAGACTATGATGATGAAAACCTGGCAAAATTTTAATTTTAAAGTTTTTC 1496  
 S I I D S S L L D Y D D E N W Q N F N F K V F 452  
 ATAGAAGAAACGGTAGACCCATCGCATACTGATGAAGTCGAAATTACCGTAAATCTAATAAACTGGAA 1564  
 I E E T V D P S H T D E V E I T V N L I N W N 476  
 TGACGAAACTCCCATATTTGAAAATGAGGAATATGATGCCGAAATTTATGAAAACGTCAGCATAACATA 1632  
 D E T P I F E N E E Y D A E I Y E N V S I H 498  
 EC5 → \*  
 CCTTCATCCAACAGGTATATGCAACCGACAGAGACGTGGACGACGAAATTAGGTACAGTCTAGTAGGA 1700  
 T F I Q Q V Y A T D R D V D D E I R Y S L V G 521  
 GCATCGGTAAATACAATTCTTGCGGTCAATTCAAGTGGGATTGTTTCGACGACTGTTGACGGAGCATT 1768  
 A S V N T I L A V N S S G I V S T T V D G A F 544  
 \*  
 TGATTACGAGCGTCAAACAGAATACATTATTCAAATTGCTGCACAAGACACGCTGCAAGTTATAAACG 1836  
 D Y E R Q T E Y I I Q I A A Q D T L Q V I N 566  
 AATCTCTCCATACAGCATAACGCTCAACTGACGATAAATATTCTGGATGTCAACGATGAAACGCCATCG 1904  
 E S L H T A Y A Q L T I N I L D V N D E T P S 589  
 ATCAGAGTTGAATCACTAATAAGTGTTGAAGAAAACAGGCCAAATGGCACAGAGATAGATTCTACTAT 1972  
 I R V E S L I S V E E N R P N G T E I D S T I 612  
 EC6 → \*  
 TACAGCAACCGATGATGACACTACAGCCGAGTTATTATTCTATATAGATTGGGATTCAACTTACGCTA 2040  
 T A T D D D T T A E L L F Y I D W D S T Y A 634  
 CAAAAAGTGGGCGAATGTATGATGACCTTCTAGAGTACTATAGAGACTGCATACTGGTAGAAACCGAA 2108  
 T K S G R M Y D D L L E Y Y R D C I L V E T E 657  
 GACATTTTCAGACACATCATCAGGTTATGCTAAAGCAAAGCTTTTTATAACGATGTGGTGGAAGGAAA 2176  
 D I S D T S S G Y A K A K L F I N D V V E G N 680  
 CACCCCTGATTATGAAAAATTTGATACCTTATACATAAGACTAATAGTAGAAGACCTGAATCAGGAAG 2244  
 T P D Y E K F D T L Y I R L I V E D L N Q E 702  
 AAGGAGAAGCTACTGCTGCAGTTACTGTTACAATTGTGGTTGAGGACCTGAATGACAATTATCCAGTT 2312  
 E G E A T A A V T V T I V V E D L N D N Y P V 725  
 TTTACGGACAGTGTTAATAACAAATAATACAGTCACAGAAGCTGCGGTTCTGTGGTGTTACTATAGGAAC 2380  
 F T D S V N T N N T V T E A A V R G V T I G T 748  
 EC7 → \*  
 CATTACTGCAACAGATGATGACGGACCAGGCTTCAATACTGTAACATATTCCATTGAGCCAGCAGGCA 2448  
 I T A T D D D G P G F N T V T Y S I E P A G 770  
 GTACTCCGCAAGGACTGGTCACGATTAATTCAACAACCTGGACTACTCACTGTGCGATGAGGATGGTGCA 2516  
 S T P Q G L V T I N S T T G L L T V D E D G A 793

ATAGATTGTGATAACCCACCTATATATTACCTTAACCTATACGGTGATTGCTACGGATGGTGAACCTAGA 2584  
 I D C D N P P I Y Y L N Y T V I A T D G E L D 816  
 \*  
 TAGCACTGCAGAAATCCAGATTTATGTCTTTGACATAAACGACAATGCACCCATCATCGAAAGTTATG 2652  
 S T A E I Q I Y V F D I N D N A P I I E S Y 838  
 TBR1  
 AGGACACAATAGAAATACCTGAGAAATCCGCCAATGGTACCAATGTTGTAGAAATAATAGCTATTGAT 2720  
 E D T I E I P E K S A N G T N V V E I I A I D 861  
 EC8  
 GCCGACCGTGATAGTCCTTACAATGTCGTCTGGTATGAATTTACAACAGCATCTAACAGCGATGTAAG 2788  
 A D R D S P Y N V V W Y E F T T A S N S D V R 884  
 AAGTTTTTCTTAATGGATATGGATACAGGAGTTATAAGCGTGCGTTACGTAAGTGCAGAATCGACTC 2856  
 S F F L M D M D T G V I S V R Y V S A E S T 906  
 TTGACAGAGACTATGGTGTTAGTTCATTTACGGTTGCCTTTAAAGCCGCTGATAACTACTACTCAACA 2924  
 L D R D Y G V S S F T V A F K A A D N Y Y S T 929  
 GGTGGCATACAAAGGAGTGCGAAGGCGTATTTACGATTATTTTAACCGATATTAATGATAAGGTCCC 2992  
 G G I Q R S A E G V F T I I L T D I N D K V P 952  
 TGTGTGTACCACCAAATACATCAGTGTATCAGAAAATACATCTAATAATACTCAAATAAGCACTCGCA 3060  
 V V T T K Y I S V S E N T S N N T Q I S T R 974  
 EC9  
 TTGAAGCCTATGATGACGACGAGGAAGGAAGTGAACAATTCAAGAATTAACCTTTGCAGTCAAAGGAATG 3128  
 I E A Y D D D E E G T D N S R I N F A V K G M 997  
 ACAGACGAAGAAGGTGCTGAATATCAGTTATTTGAGATAGTAAATGACGAAGATGAGAACGGTGTAGC 3196  
 T D E E G A E Y Q L F E I V N D E D E N G V A 1020  
 ATACCTTTCCACGCTTGTTGATTTAGAGGGTTATTATGGCAACTATACTTTGATCATTGAGGTGAACG 3264  
 Y L S T L V D L E G Y Y G N Y T L I I Q V N 1042  
 ATTTTGGAGAACCCTATGAATACTGAAAATTATAGTGTAACCTTGGAATTTGAAAAGTATAGTTACTAT 3332  
 D F G E P M N T E N Y S V T L E I E K Y S Y Y 1065  
 GCACCAGACTATCTATACCCTGAAAATCCTGACGGTGAACGAGTGTACCTTAGAAAGACCCAAAACGT 3400  
 A P D Y L Y P E N P D G E R V Y L R K T Q N V 1088  
 TAACGGACAACCTATACTTGTACGATGGACGTGAACCTACCAAATATTCAAGCTACCGATAACCAAGGTG 3468  
 N G Q L Y L Y D G R E L P N I Q A T D N Q G 1110  
 EC10  
 AAAAATGGGATATTACTTTTACAATCGACTCTGATGATTGAGGCTATGATTTTCCAAATCGAC 3536  
 E K W D I T F T I D S D D S D E A M I F Q I D 1133  
 AATTCAGATTCTCTGGGTCAATCAACAGGAATGCTGCAATTAACCTACAATAGAAAACTGGGAAGATCA 3604  
 N S D S L G Q S T G M L Q L T T I E N W E D Q 1156  
 ATATACCTTGAATATAATAGCAAATGATAACGGAACCTCCACAACGCACTGCGAATGCTGTAATGTATA 3672  
 Y T L N I I A N D N G T P Q R T A N A V M Y 1178  
 TTCGATTCTTTGATTTAAATTCATTGCCATATTTTCCGAAAATGAAAGGCAACTAACAGCGCAGTTC 3740  
 I R F F D L N S L P Y F P E N E R Q L T A Q F 1201  
 EC11

ACAGAAAATACAACAGGAATGTCTGAGAGTGTTCATCCCAGGTGCTTCATATAGTGGCACTGAAGA 3808  
T E N T T G M S E S V S I P G A S Y S G T E D 1224  
CGAAGACTTTGATGTGTACTATTTATTGCTTGAAGGAAACAGCAGCATTTTAAATATCGATATTAATA 3876  
E D F D V Y Y L L L E G N S S I F N I D I N 1246  
CTGGACTAATTACCCTTTTGGAAATGTTAGACAGAGAAGAAACAGCATCACACGATATTACAATAATT 3944  
T G L I T L L E M L D R E E T A S H D I T I I 1269  
GCATCTAACAGTGATTCTGTTCCAACCAGTTATGATGAACAGTCCTTGCTTTTCGTTACTATTAAGGT 4012  
A S N S D S V P T S Y D E Q S L L F V T I K V 1292  
\* TBR2  
AATTGATGTAAATGACAATCCACCACAATTTAGCGAAAGTCGGTACACTGGAGGAATAAGTACTTCGA 4080  
I D V N D N P P Q F S E S R Y T G G I S T S 1314  
EC12  
GTTCTTTGGATTATACTGTGACTACAGTTTCAGCGTACGATCCAGATATTAACGATACCTTAACCTTAC 4148  
S S L D Y T V T T V S A Y D P D I N D T L T Y 1337  
TCAATTAACACATCAAGTTTAACCGTTAGTGATTTCATCGCTCTCCAACATTGCTACACCTTTCAGAAT 4216  
S I N T S S L T V S D S S L S N I A T P F R I 1360  
TGATTCATCATCTGGTGCGGTAACATTAAACTTCGCAGTTCAAAGCAACATGCTTGGATATTTTGCCT 4284  
D S S S G A V T L N F A V Q S N M L G Y F A 1382  
TBR3  
TCAATGTTGTTGTAAGTACCCACCTCCATATCATAACAGATACAGCACTCGTAGAGATTTATATAATC 4352  
F N V V V T D P P P Y H T D T A L V E I Y I I 1405  
ACGGATGAACATAGGGTGGAGTTTACTTTCCAGAATGATCTGAACACTGTAATAGCTCTTCAGTCCGA 4420  
T D E H R V E F T F Q N D L N T V I A L Q S E 1428  
GGTAAAAGATGTATTAGATGACGCGTTTGAATATTTATGCAACATTGAATCTATTCTTAGTGATACGG 4488  
V K D V L D D A F E Y L C N I E S I L S D T 1450  
ATGATGATGGCCAAACTTTGGATACTCAAAGTGTATGTACTGTACATTTTATTGATCCTGAATTAAT 4556  
D D D G Q T L D T Q T V C T V H F I D P E L N 1473  
GAACCAGTTAATAAACTACAATACAGAGCAAAGTCTAGTAGTCTAACATTCTATTCAAATCTGCGAAG 4624  
E P V N K T T I Q S K L S S L T F Y S N L R S 1496  
CTCCTTCAGCAATATTACATTGTATCTTTTGAGTTACTCAAGTGGATCTACAACAACAGATAATCTTG 4692  
S F S N I T L Y L L S Y S S G S T T T D N L 1518  
\*  
AAGATCAATTAAGCTTGGCTAATAGGTGTGACTGTTGTACTAGGATCTCTCTGTATTACACTCCTA 4760  
E D Q L K A W L I G V T V V L G S L C I T L L 1541  
GTTGGATTTATCATCAAGCTACAACATTGAAACGACGCTTGAATAAGTTATCAGAAGTTAAATTTGG 4828  
V G F I I K L Q T L K R R L N K L S E V K F G 1564  
TTCTCAAGAGTCTGGTTTAAACCGCATTGGTGTAGCTGTTCCAAATACTAACAAAAATGCAGTTGAAG 4896  
S Q E S G L N R I G V A V P N T N K N A V E 1586  
GTTCTAATCCAGTTTATAATGAGGAAAAGAAAATTCCAGATTTTGATCGATCAAGTATTCATAGTGGA 4964  
G S N P V Y N E E K K I P D F D R S S I H S G 1609

```

GACTCCGACCTTATTGGTGTGAAGACAATCCAGAATTTGACTATGGCATTAAAAATGAAAGATACTG 5032
D S D L I G V E D N P E F D Y G I K N E R Y 1631
.....
ACAAAGTGAATCATATATAGGTAATATAAGGTTTTAGCTGGCAAAGAAATTTGAGAGCATATAAATAA 5100
ATAAATAAATAAATAAATGT 5120

```

**Supplementary Figure S5.** cDNA sequence and deduced open reading frame of the *R. dominica* BtR1-like cadherin gene (*RdCad1*). The predicted domains are underlined: the membrane signal peptide with a dashed line, the MPED domain with a solid line, and CYT domain with a dotted line. The start of each of the twelve cadherin repeat domains is marked with a solid arrow. The TM domain region is shaded gray. Predicted N- and O-glycosylation sites are marked by asterisks. The putative toxin binding regions (TBR1-3) are designated by the rounded rectangle below the sequence.
