# Supplementary material for: The Genome of Rhyzopertha dominica (Fab.) (Coleoptera: Bostrichidae): Adaptation for Success
Source: MDPI journal article supplement (doi:10.3390/genes13030446), 2022-02-28
Supplement: s1 [file s1]

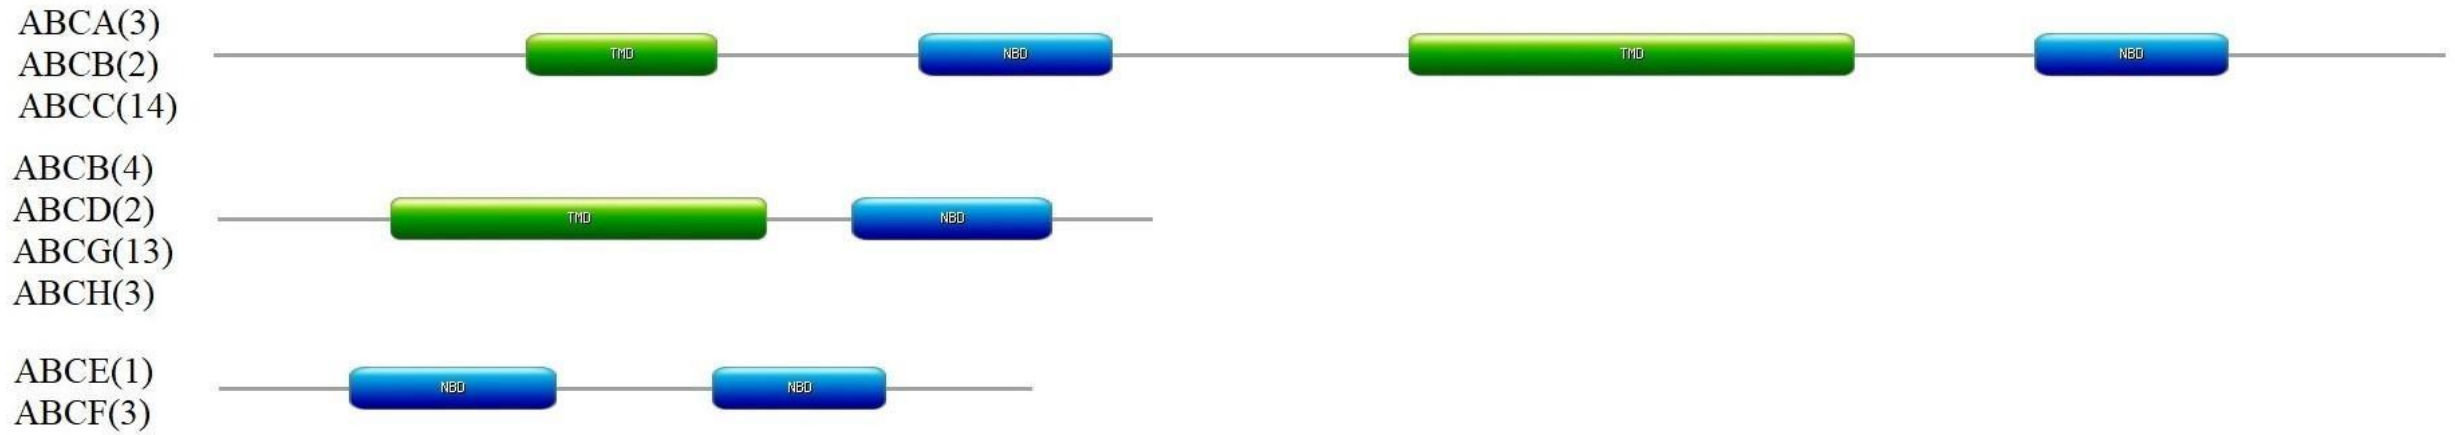

**Supplementary Figure S2.** Conserved domain analysis of the ABC transporters of *R. dominica*. The numbers in parentheses indicate the number of ABC transporters in each subfamily. TMD: transmembrane domain; NBD: nucleotide binding domain.
