# Supplementary material for: The Genome of Rhyzopertha dominica (Fab.) (Coleoptera: Bostrichidae): Adaptation for Success
Source: MDPI journal article supplement (doi:10.3390/genes13030446), 2022-02-28
Supplement: s1 [file s1]

a.

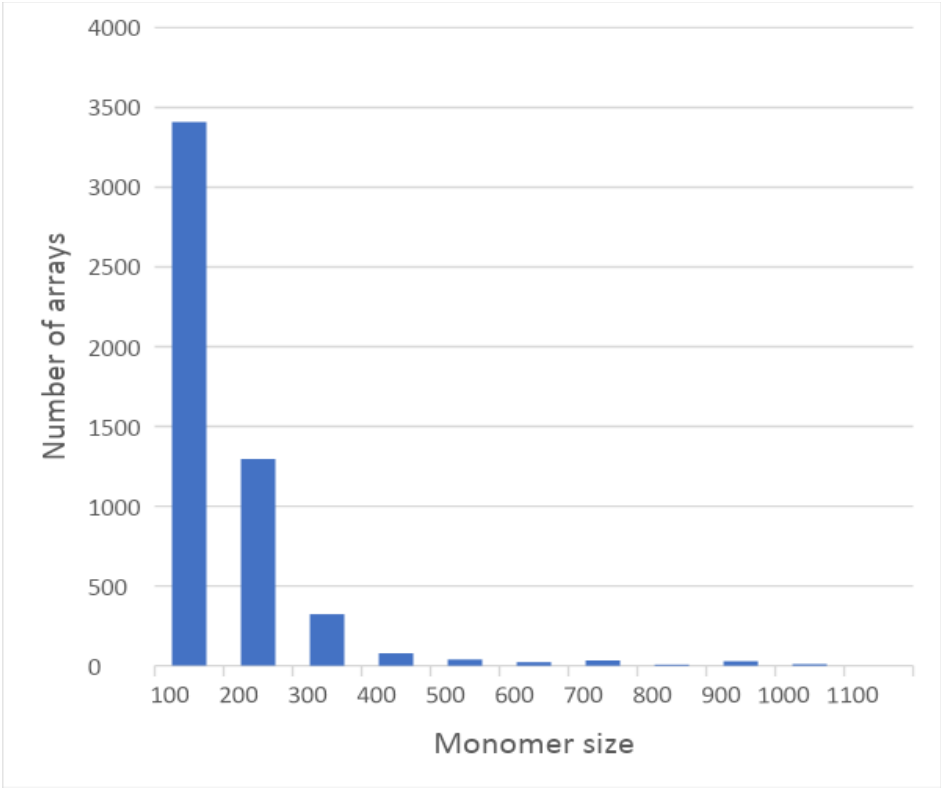

b.

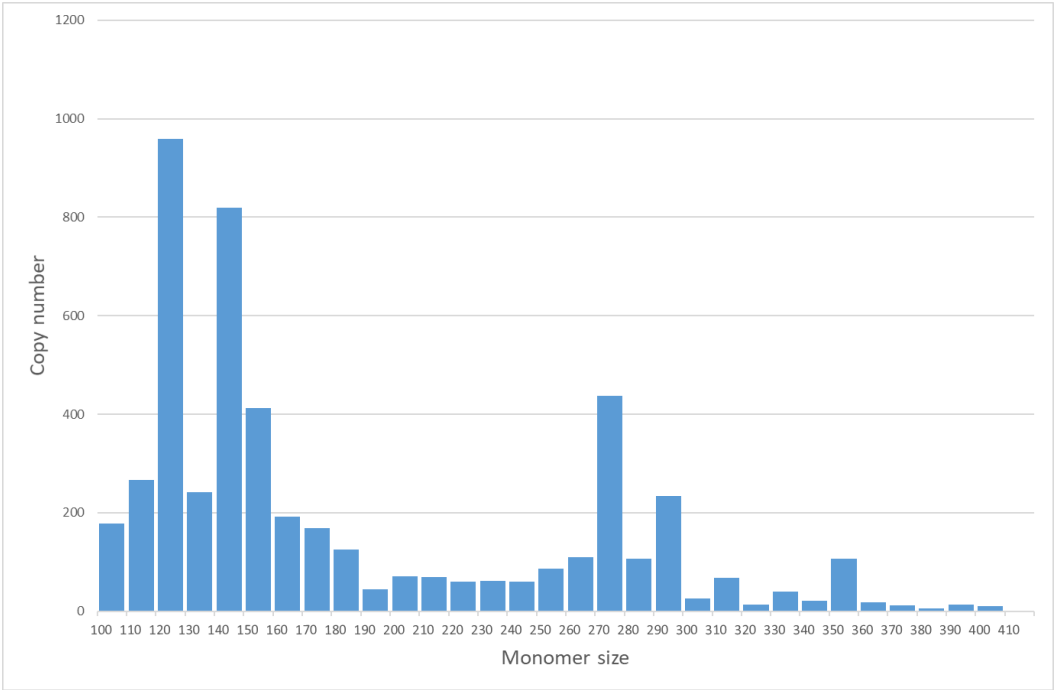

**c.**

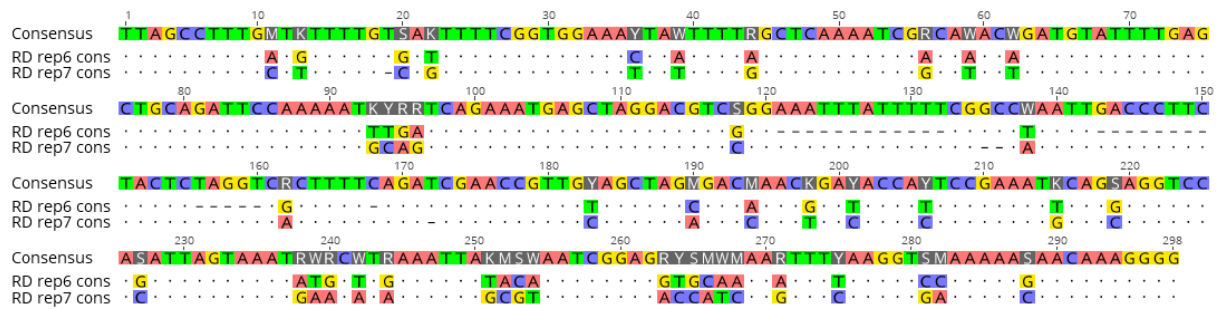

**Supplementary Figure S9.** Evaluation of monomers in the *R. dominica* genome. (a). Distribution of number of arrays according to the monomer length. Monomer size of up to 2000 bp was examined (shown only up to 1100 bp due to the decreasing abundance). (b). Number of monomers in relation to the monomer size. (c). Alignment of consensus sequences of two related families, RD rep6 and rep7.
