# Supplementary figures and images for: The Genome of Rhyzopertha dominica (Fab.) (Coleoptera: Bostrichidae): Adaptation for Success
Source: MDPI journal article supplement (doi:10.3390/genes13030446), 2022-02-28

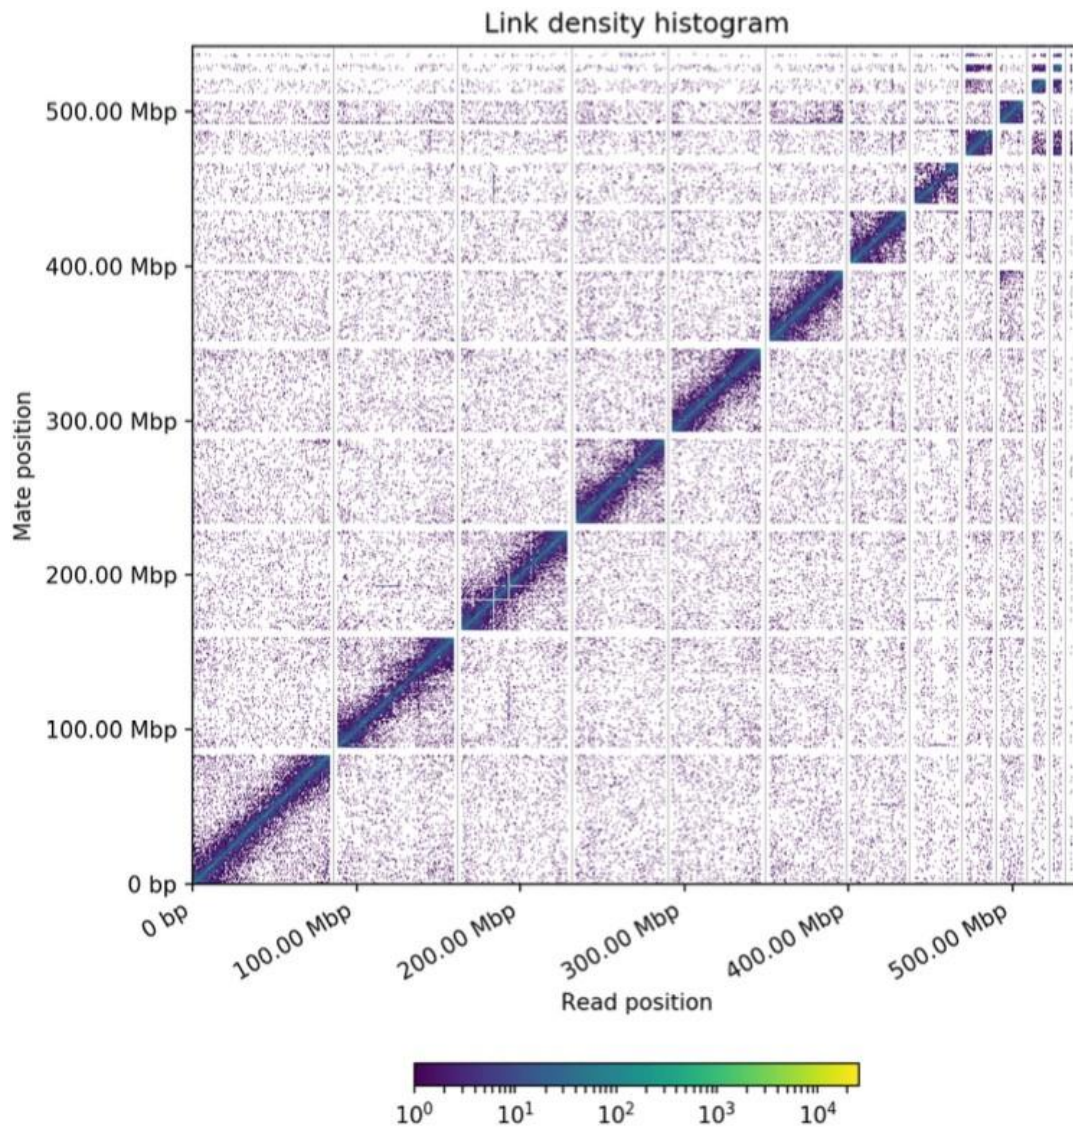

**Supplementary Figure S1.** Link density histogram of Hi-C scaffolded *R. dominica* genome assembly.

Supplement: s1 [file s1]
